# Supplementary material for: Obstructive sleep apnea increases heart rhythm disorders and worsens subsequent outcomes in elderly patients with subacute myocardial infarction
Source: PubMed Central journal article supplement — J Geriatr Cardiol. 2021 Jan 28;18(1):30–8. doi: 10.11909/j.issn.1671-5411.2021.01.002 (PMC7868912; doi:10.11909/j.issn.1671-5411.2021.01.002), 2021-01-28
Supplement: jgc-18-1-30-S1.pdf [file jgc-18-1-30-S1.pdf]

## Supplemental figures

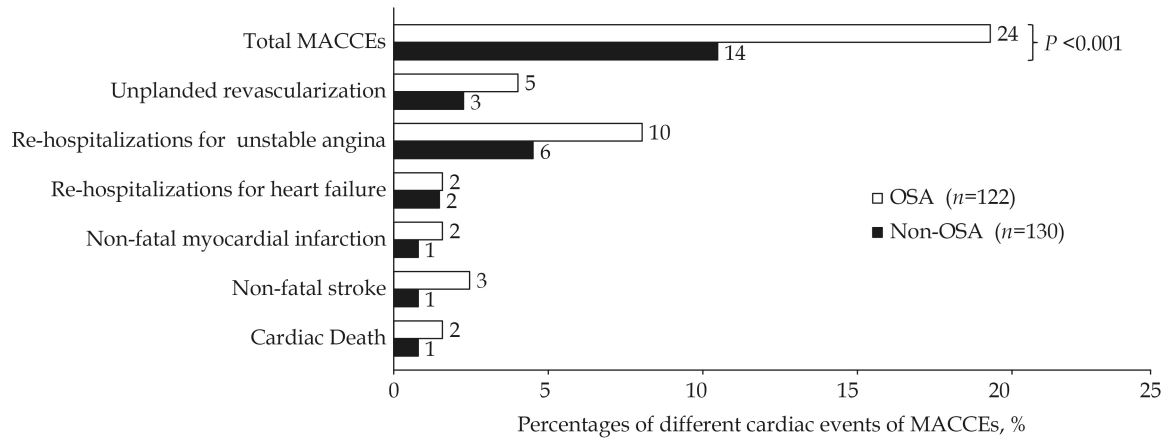

**Figure S1** The difference of MACCEs in between OSA and Non-OSA groups is significant during the 6-month follow-up. MACCEs: major adverse cardiac and cerebrovascular events; OSA: obstructive sleep apnea.
